# Supplementary material for: Newly Recognized Spotted Fever Group Rickettsia as Cause of Severe Rocky Mountain Spotted Fever–Like Illness, Northern California, USA
Source: PubMed Central journal article supplement (PMC11210658; doi:10.3201/eid3007.231771), 2024-07
Supplement: 23-1771-Techapp-s1.pdf [file 23-1771-Techapp-s1.pdf]

Article DOI: <https://doi.org/10.3201/eid3007.231771>

*EID cannot ensure accessibility for supplementary materials supplied by authors. Readers who have difficulty accessing supplementary content should contact the authors for assistance.*

# Newly Recognized Spotted Fever Group *Rickettsia* as Cause of Severe Rocky Mountain Spotted Fever–Like Illness, Northern California

## Appendix

### Triplex Real-time Reverse Transcription PCR (rRT-PCR)

Specimens were tested for *Rickettsia* using a laboratory-developed triplex real-time reverse transcription PCR (rRT-PCR) assay targeting a *R. rickettsii*-specific 23S rRNA single nucleotide polymorphism (SNP) (T101C, GenBank accession number NR\_103963), a *R. typhi*-specific 23S rRNA SNP (T1976C, GenBank accession no. NR\_076209), and genus-specific regions of the 23S rRNA (Table S1). The assay was developed and validated by the California Department of Public Health Viral and Rickettsial Disease Laboratory (validation report available upon request). The rRT-PCR mixture consisted of 1X One Step PrimeScript III RT-PCR master mix (Takara Bio USA, [www.takarabio.com/](http://www.takarabio.com/)), Rrick23S\_F and Rrick23S\_R primers at 300 nM, Rrick23S\_P probe at 120 nM, Rtyp23S\_F and Rtyp23S\_R primers at 500 nM, Rtyp23S\_P probe at 300 nM, and RCKr\_F and RCKr\_R primers at 500 nM, and RCKr\_P at 80 nM. The nucleic acid input volume was 10  $\mu$ L for a final reaction volume of 25  $\mu$ L. Reverse transcription, amplification, and fluorescence detection were performed using an ABI 7500 FAST DX Sequence Detection System (Thermo Fisher Scientific, [www.thermofisher.com/us/en/home.html](http://www.thermofisher.com/us/en/home.html)) with the following cycling parameters: 50°C for 10 min, 95°C for 2 min followed by 40 cycles of 95°C for 3 s and 60°C for 40 s. Fluorescent readings were collected during the 60°C anneal/extension step.

## References

- Chung IH, Robinson LK, Stewart-Juba JJ, Dasch GA, Kato CY. Analytically sensitive *Rickettsia* species detection for laboratory diagnosis. *Am J Trop Med Hyg.* 2022;106:1352–7. [PubMed](https://doi.org/10.4269/ajtmh.21-0757)  
<https://doi.org/10.4269/ajtmh.21-0757>

**Appendix Table 1.** Triplex rRT-PCR oligonucleotide primer and probe sequences

| Assay                                | Analyte                     | Oligonucleotide Name                     | Oligonucleotide Sequence and Modifications*                                    |
|--------------------------------------|-----------------------------|------------------------------------------|--------------------------------------------------------------------------------|
| <i>Rickettsia</i><br>Triplex rRT-PCR | <i>Rickettsia</i> 23S rRNA† | RCKr_F                                   | GGTCCYACAGACTTACCAAACCTCA                                                      |
|                                      |                             | RCKr_R<br>RCKR_P                         | TCGACTATGGACCTTAGCACCCAT                                                       |
|                                      |                             | <i>R. rickettsii</i> 23S rRNA<br>SNP     | Rrick23S_F<br>VIC-CCGAATGTCGATGAGTACAGCATAGCAGAC-QSY<br>GCGATGAAGGACGTAATACGCT |
| <i>R. typhi</i> 23S rRNA SNP         |                             | Rrick23S_R                               | TAGGTAGGTTTCCCTATTCGGA                                                         |
|                                      |                             | Rrick23S_P                               | Q670-CGGATCGAAGTTTATTTCGCA-BHQ2                                                |
|                                      |                             | Rtyp23S_F                                | CTAACGCCTCTGCTTCGCAG                                                           |
|                                      |                             | Rtyp23S_R                                | GAAAGACCCCGTGAACCTTTACTA                                                       |
|                                      | Rtyp23S_P                   | 6FAM-TGCACATTT/ZEN/GACTTCTAACACC-3IABkFQ |                                                                                |

\*Oligonucleotide modifications: 6FAM (6-carboxyfluorescein), VIC, Q670 (Quasar 670) are fluorescent dyes. QSY, BHQ2 (Black Hole Quencher 2), ZEN, and IABkFQ (Iowa Black Fluorescent Quencher) are nonfluorescent acceptor dyes.

†Modified from Chung et al. (1).

**Appendix Table 2.** Primer sequences, master mix, and amplification conditions for MLST

| Amplification Reaction                     | Primer Name | Primer Sequences         | Primer Reaction Concentration | Master Mix                               | Amplification Parameters                                                                                           |
|--------------------------------------------|-------------|--------------------------|-------------------------------|------------------------------------------|--------------------------------------------------------------------------------------------------------------------|
| 23S rRNA<br>Outer RT-PCR<br>Long Amplicon  | RkAS77F2    | CTTCGGGGAGTTGCGAATAA     | 600 nM                        | Superscript IV<br>One-Step RT-PCR System | 55°C for 20 min, 98°C for 2 min, 45 cycles of 98°C for 10 s, 64°C for 10 s, 72°C for 1 min, hold at 72°C for 5 min |
|                                            | Rk23S1606R  | GGTCATCTTTCTCCGAAGTTACAG | 600 nM                        |                                          |                                                                                                                    |
| 23S rRNA<br>Inner PCR<br>Long Amplicon     | RkAS77F2    | CTTCGGGGAGTTGCGAATAA     | 240 nM                        | Q5 Hot Start,<br>High Fidelity           | 98°C for 30 s, 35 cycles of 98°C for 5 s, 64°C for 20 s, 72°C for 40 s, hold at 72°C for 2 min                     |
|                                            | Rk23S1588R  | GTTACAGATGYAATTTGCCTAGTT | 240 nM                        |                                          |                                                                                                                    |
| 23S rRNA<br>Outer RT-PCR<br>Short Amplicon | Rk23S42F    | AGAAGGCGATGAAGGACGTAAT   | 600 nM                        | Superscript IV<br>One-Step RT-PCR System | 55°C for 20 min, 98°C for 2 min, 45 cycles of 98°C for 10 s, 62°C for 10 s, 72°C for 30 s, hold at 72°C for 5 min  |
|                                            | RkPan558R   | GGTACGCCGTACAAGACAT      | 600 nM                        |                                          |                                                                                                                    |
| 23S rRNA<br>Inner PCR<br>Short Amplicon    | RkAS77F2    | CTTCGGGGAGTTGCGAATAA     | 240 nM                        | Q5 Hot Start,<br>High Fidelity           | 98°C for 30 s, 35 cycles of 98°C for 5 s, 64°C for 20 s, 72°C for 20 s, hold at 72°C for 2 min                     |
|                                            | Rk23S517R   | GCTTGTAAGCATTGGTTTCAGAT  | 240 nM                        |                                          |                                                                                                                    |

| Amplification Reaction   | Primer Name              | Primer Sequences                                | Primer Reaction Concentration | Master Mix                            | Amplification Parameters                                                                                           |
|--------------------------|--------------------------|-------------------------------------------------|-------------------------------|---------------------------------------|--------------------------------------------------------------------------------------------------------------------|
| 16S rRNA Outer RT-PCR    | Rk16S53F                 | AGTCTTTAAGGAGGTAATCCAGC                         | 400 nM                        | Superscript IV One-Step RT-PCR System | 55°C for 20 min, 98°C for 2 min, 45 cycles of 98°C for 10 s, 62°C for 10 s, 72°C for 1 min, hold at 72°C for 5 min |
| 16S rRNA Inner PCR       | Rk16S1570R               | AACTGACAGAATCAAACCTTGAGAGT                      | 400 nM                        | Q5 Hot Start, High Fidelity           | 98°C for 30 s, 35 cycles of 98°C for 5 s, 64°C for 30 s, 72°C for 30 s, hold at 72°C for 2 min                     |
|                          | Rk16S53F                 | AGTCTTTAAGGAGGTAATCCAGC                         | 200 nM                        |                                       |                                                                                                                    |
| <i>gltA</i> PCR          | Rk16S1556R<br>SFGgltA71F | AACTTGAGAGTTTGATCCTGGCT<br>GTTCCAGGCTTCGTGCATTC | 200 nM<br>200 nM              | Q5 Hot Start, High Fidelity           | 98°C for 1 min, 45 cycles of 98°C for 10 s, 64°C for 20 s, 72°C for 1 min, hold at 72°C for 2 min                  |
| <i>ompA</i> PCR          | SFGgltA1226R<br>RR190-70 | AAAGCAAGTATCGGTGAGGATG<br>ATGGCGAATATTTCTCCAAA  | 200 nM<br>200 nM              | Q5 Hot Start, High Fidelity           | 98°C for 1 min, 45 cycles of 98°C for 10 s, 60°C for 20 s, 72°C for 40 s, hold at 72°C for 2 min                   |
|                          | RR190-701                | GTTCCGTTAATGGCAGCATCT                           | 200 nM                        |                                       |                                                                                                                    |
| <i>ompB1-2</i> Outer PCR | SFGompB65F               | GAGCGATTAGAAGTTTACACGGA                         | 200 nM                        | Q5 Hot Start, High Fidelity           | 98°C for 1 min, 45 cycles of 98°C for 10 s, 60°C for 20 s, 72°C for 1:30 min, hold at 72°C for 2 min               |
| <i>ompB1</i> Inner PCR   | SFGompB2850<br>R         | CTACTACCGATGCTAACGTAGGT                         | 200 nM                        | Q5 Hot Start, High Fidelity           | 98°C for 1 min, 35 cycles of 98°C for 5 s, 64°C for 20 s, 72°C for 40 s, hold at 72°C for 2 min                    |
|                          | SFGompB65F               | GAGCGATTAGAAGTTTACACGGA                         |                               |                                       |                                                                                                                    |
| <i>ompB2</i> Inner PCR   | SFGompB1609<br>R         | GCAAGTGGTACTTCAACATGGG                          | 200 nM                        | Q5 Hot Start, High Fidelity           | 98°C for 1 min, 35 cycles of 98°C for 5 s, 64°C for 20 s, 72°C for 40 s, hold at 72°C for 2 min                    |
|                          | SFGompB1391<br>F         | GTTAAATCTAGCACCACTTGGGA                         | 200 nM                        |                                       |                                                                                                                    |
| <i>ompB3-4</i> Outer PCR | SFGompB2850<br>R         | CTACTACCGATGCTAACGTAGGT                         | 200 nM                        | Q5 Hot Start, High Fidelity           | 98°C for 1 min, 45 cycles of 98°C for 10 s, 60°C for 20 s, 72°C for 1:30                                           |
|                          | SFGompB2692<br>F         | CGTTAAATGTTGCATTACCTAAGAA<br>CT                 | 200 nM                        |                                       |                                                                                                                    |

| Amplification Reaction | Primer Name   | Primer Sequences             | Primer Reaction Concentration | Master Mix                  | Amplification Parameters                                                                          |
|------------------------|---------------|------------------------------|-------------------------------|-----------------------------|---------------------------------------------------------------------------------------------------|
|                        | SFGompB5000 R | AGGGTTGGTAACTGCTTCTACAG      | 200 nM                        |                             | min, hold at 72°C for 2 min                                                                       |
| <i>ompB3</i> Inner PCR | SFGompB2692 F | CGTTAAATGTTGCATTACCTAAGAA CT | 400 nM                        | Q5 Hot Start, High Fidelity | 98°C for 1 min, 35 cycles of 98°C for 5 s, 64°C for 20 s, 72°C for 40 s, hold at 72°C for 2 min   |
|                        | SFGompB4180 R | GTTACAGGAAGTTTAGGCGGT        | 400 nM                        |                             |                                                                                                   |
| <i>ompB4</i> Inner PCR | SFGompB3546 F | CCGTTTATAACTGTACCGTCAGC      | 200 nM                        | Q5 Hot Start, High Fidelity | 98°C for 1 min, 35 cycles of 98°C for 5 s, 64°C for 20 s, 72°C for 40 s, hold at 72°C for 2 min   |
|                        | SFGompB5000 R | AGGGTTGGTAACTGCTTCTACAG      | 200 nM                        |                             |                                                                                                   |
| <i>sca4-1</i> PCR      | SFGsca4-67F   | TGAGAGGTTTTATGAGTAAAGACG GT  | 200 nM                        | Q5 Hot Start, High Fidelity | 98°C for 1 min, 45 cycles of 98°C for 10 s, 64°C for 20 s, 72°C for 1 min, hold at 72°C for 2 min |
|                        | SFGsca4-1734R | CAATTGCTGCAGCTCTACTTGC       | 200 nM                        |                             |                                                                                                   |
| <i>sca4-2</i> PCR      | SFGsca4-1533F | GCTGGAGTCAATGCAGTATTAGAA     | 200 nM                        | Q5 Hot Start, High Fidelity | 98°C for 1 min, 45 cycles of 98°C for 10 s, 64°C for 20 s, 72°C for 1 min, hold at 72°C for 2 min |
|                        | SFGsca4-3158R | ACAGAATACAAATCTTGATCAGCGT    | 200 nM                        |                             |                                                                                                   |

**Appendix Table 3.** MLST sequencing primers

| Amplicon     | Primer Name   | Sequence                 |
|--------------|---------------|--------------------------|
| 23S rRNA     | RkAS77F2      | CTTCGGGGAGTTGCGAATAA     |
|              | RkAS503F      | CAAATGCTTACAAGCAGTCGGA   |
|              | Rk23S517R     | GCTTGTAAGCATTGGTTTCAGAT  |
|              | Rk23S598R     | GCTTGCTAGATAAACTAAGTCGC  |
|              | Rk23S1025F    | GATGTGAGAAGACCAAAACAACTA |
|              | RkAS1158R     | TCTTCGGTACATGACTTGAGCC   |
| 16S rRNA     | Rk23S1588R    | GTTACAGATGYAATTTGCCTAGTT |
|              | Rk16S55F      | AGTCTTTAAGGAGGTAATCCAGC  |
|              | Rk16S656F     | TTATGCGTTAGCTGCGAAAC     |
|              | Rk16S709R     | CGATGAGTGCTAGATATCGGAA   |
|              | Rk16S1556R    | AACTTGAGAGTTTGATCCTGGCT  |
| <i>gltA</i>  | SFGgltA71F    | GTTCAGGGTCTTCGTGCATTTTC  |
|              | RkgltA506F    | GCATATGATGTTTGCAACGC     |
|              | RkgltA602R    | CTCATGATCGGCATGTAGGA     |
| <i>ompA</i>  | SFGgltA1226R  | AAAGCAAGTATCGGTGAGGATG   |
|              | RR190-70      | ATGGCGAATATTTCTCCAAA     |
| <i>ompB1</i> | RR190-701     | GTTCCGTTAATGGCAGCATCT    |
|              | SFGompB67F    | GAGCGATTAGAAGTTTACACGGA  |
| <i>ompB2</i> | RkompB1-815F  | GCTAGCGTATCTAAACCGATTAC  |
|              | RkompB1-893R  | CACATCAAAGTAAGAAAGGTGGT  |
|              | SFGompB1609R  | GCAAGTGGTACTTCAACATGGG   |
|              | SFGompB1391F  | GTTAAATCTAGCACCACCTTGGG  |
|              | RkompB2-1996F | ACCGTCATTAATTGTTGCGTTA   |

| Amplicon | Primer Name   | Sequence                    |
|----------|---------------|-----------------------------|
| ompB3    | RkompB2-2123R | ATACCCCTGGTACAGTTTATGG      |
|          | SFGompB2850R  | CTACTACCGATGCTAACGTAGGT     |
|          | SFGompB2692F  | CGTTAAATGTTGCATTACCTAAGAACT |
|          | RkompB3-3479F | GCACTACCGTCTAAGGTAATAGT     |
| ompB4    | RkompB3-3592R | TGCCGGTTCTATCTTTAAACTTG     |
|          | SFGompB4180R  | GTTACAGGAAGTTTAGGCGGT       |
|          | SFGompB3546F  | CCGTTTATAACTGTACCGTCAGC     |
|          | RkompB4-4214F | AATACTAATCTACCCGTACCGTC     |
| sca4-1   | RkompB4-4278R | AATTTACAAGCAGGTGGTACT       |
|          | SFGompB5000R  | AGGGTTGGTAACTGCTTCTACAG     |
|          | SFGsca4-67F   | TGAGAGGTTTATGAGTAAAGACGGT   |
|          | RkSka4a758F   | GCCGTATATTTCACTGCCCA        |
| sca4-2   | RkSka4a856R   | TCCGGTCCGGCAAATTTTA         |
|          | SFGsca4-1734R | CAATTGCTGCAGCTCTACTTGC      |
|          | SFGsca4-1533F | GCTGGAGTCAATGCAGATTAGAA     |
|          | Rksca4-2322F  | AGGTCCTGAATAACTAAGGCA       |
|          | Rksca4-2399R  | TTAAGTGCTCTTTCTCAGAGT       |
|          | SFGsca4-3158R | ACAGAATACAAATCTTGATCAGCGT   |

**Appendix Table 4.** *Rickettsiales* nucleic acids used for assessing analytical specificity of the *Rickettsia* sp. CA6269 Real-time PCR Assay

| Organism                         | Strain            | Source        |
|----------------------------------|-------------------|---------------|
| <i>Anaplasma phagocytophilum</i> | NCH-1             | BEI Resources |
| <i>Ehrlichia chaffeensis</i>     | St. Vincent       | BEI Resources |
| <i>Orientia tsutsugamushi</i>    | Karp              | CDC           |
| <i>Rickettsia africae</i>        | R8637             | CDC           |
| <i>R. akari</i>                  | Kaplan            | CDC           |
| <i>R. amblyommatis</i>           | GAT-30V           | CDC           |
| <i>R. asenbonensis</i>           | NMRC11            | CDC           |
| <i>R. conorii</i>                | R0362             | CDC           |
| <i>R. felis</i>                  | Baton Rouge       | CDC           |
| <i>R. massiliae</i>              | AZT80             | CDC           |
| <i>R. parkeri</i>                | Maculatum 20      | CDC           |
| <i>R. prowazekii</i>             | Madrid II         | CDC           |
| <i>R. rhipicephali</i>           | 20-4164           | CDC           |
| <i>R. sibirica</i>               | 246               | BEI Resources |
| <i>R. tillamookensis</i>         | Tillamook 23      | CDC           |
| <i>R. typhi</i>                  | Wilmington        | CDC           |
| <i>R. rickettsii</i>             | Hlp2              | CDC           |
| <i>R. rickettsii</i>             | Columbia          | CDC           |
| <i>R. rickettsii</i>             | Costa Rica        | CDC           |
| <i>R. rickettsii</i>             | Brazil            | CDC           |
| <i>R. rickettsii</i>             | Hauke             | CDC           |
| <i>R. rickettsii</i>             | 80JC              | CDC           |
| <i>R. rickettsii</i>             | Coleman           | CDC           |
| <i>R. rickettsii</i>             | Stewart           | CDC           |
| <i>R. rickettsii</i>             | 76RC              | CDC           |
| <i>R. rickettsii</i>             | Sheila Smith      | CDC           |
| <i>Rickettsia</i> sp. 364D       | Pierce Canyon     | CDC           |
| <i>Rickettsia</i> sp. 364D       | Wright Peak       | CDC           |
| <i>Rickettsia</i> sp. 364D       | Pine Mountain     | CDC           |
| <i>Rickettsia</i> sp. 364D       | Crystal Cove      | CDC           |
| <i>Rickettsia</i> sp. 364D       | El Moro Canyon    | CDC           |
| <i>Rickettsia</i> sp. 364D       | Lake              | CDC           |
| <i>Rickettsia</i> sp. 364D       | Cache Creek Ridge | CDC           |
| <i>Rickettsia</i> sp. 364D       | Highland Creek    | CDC           |
| <i>Rickettsia</i> sp. 364D       | Orange            | CDC           |
| <i>Rickettsia</i> sp. 364D       | Mt. Konocti       | CDC           |
| <i>Rickettsia</i> sp. 364D       | 364D              | CDC           |
